# Supplementary material
Source: PubMed Central journal article supplement (PMC3016665)
Supplement: 10.3163.1536-5050.99.1.015.sg001.pdf [file 10.3163.1536-5050.99.1.015.sg001.pdf]

**Physicians and their use of information: a survey comparison between the United States, Canada, and the United Kingdom**

**Karen S. Davies, PhD**

**Table 1**  
Medical websites searched for email contact details of physicians

| Canada                                          |                                | United States                                                    |                                 | United Kingdom                                                       |                         |
|-------------------------------------------------|--------------------------------|------------------------------------------------------------------|---------------------------------|----------------------------------------------------------------------|-------------------------|
| Site                                            | Uniform resource locator (URL) | Site                                                             | URL                             | Site                                                                 | URL                     |
| Canadian Association of Emergency Physicians    | www.caep.ca                    | American Academy of Family Physicians                            | www.aafp.org                    | <i>BMJ</i>                                                           | www.bmj.com             |
| Canadian Medical Association                    | www.mydoctor.ca                | American Autonomic Society                                       | www.mc.Vanderbilt.edu/gcrc/aas/ | British Association for Sexual Health and HIV                        | www.bashh.org           |
| The College of Family Physicians of Canada      | www.cfpc.ca/cfp/               | American Pain Society                                            | www.ampainsoc.org               | The British Association of Dermatologists                            | www.bad.org.uk          |
| Dalhousie University: Faculty of Medicine       | dom.medicine.dal.ca            | Children's Hospital Boston                                       | www.childrenshospital.org       | British Association of Plastic Reconstructive and Aesthetic Surgeons | www.bapras.org.uk       |
| McMaster University: Faculty of Health Sciences | www.fhs.mcmaster.ca            | Classical Homeopathic Physicians in the United States of America | www.homeopathic-md-do.com       | Bupa Hospitals                                                       | www.bupahospitals.co.uk |
| McMaster University: Family Medicine            | www.fammedmcmaster.ca          | The Environmental Illness Resources                              | www.ei-resource.org             | The Cardiothoracic Surgery Network                                   | www.ctsnet.org          |

| Canada                                      |                                          | United States                                                          |                                     | United Kingdom                                                                                                                |                               |
|---------------------------------------------|------------------------------------------|------------------------------------------------------------------------|-------------------------------------|-------------------------------------------------------------------------------------------------------------------------------|-------------------------------|
| Site                                        | Uniform resource locator (URL)           | Site                                                                   | URL                                 | Site                                                                                                                          | URL                           |
| Memorial University:<br>Faculty of Medicine | www.med.mun.ca                           | Harvard Medical<br>School:<br>Department of<br>Population<br>Medicine  | www.populationmed<br>icine.org      | Faculty of Sexual<br>Health and<br>Reproductive<br>Healthcare of the<br>Royal College of<br>Obstetricians &<br>Gynaecologists | www.ffprhc.org.uk             |
| Society of Rural<br>Physicians of<br>Canada | www.srpc.ca                              | International<br>Essential Tremor<br>Foundation                        | www.essentialtremor<br>.org         | The Healthy House                                                                                                             | www.healthy -<br>house.co.uk  |
| University of<br>Manitoba: Medicine         | www.umanitoba.ca/facul<br>ties/medicine/ | <i>The Journal of the<br/>American<br/>Osteopathic<br/>Association</i> | www.jaoa.org                        | Homerton University<br>Hospital National<br>Health Service<br>(NHS) Foundation<br>Trust                                       | www.homerton.nhs<br>.uk       |
|                                             |                                          | Mount Sinai School<br>of Medicine                                      | www.mssm.edu                        | Leukaemia &<br>Lymphoma<br>Research                                                                                           | www.beatblood<br>cancers.org  |
|                                             |                                          | New York Medical<br>College                                            | www.nymc.edu                        | The London Clinic                                                                                                             | www.thelondonclinic<br>.co.uk |
|                                             |                                          | Smartplasticsurgery                                                    | www.smartplasticsur<br>gery.com     | Newcastle University                                                                                                          | www.ncl.ac.uk                 |
|                                             |                                          | University of<br>Chicago: Family<br>Medicine                           | familymedicine.bsd<br>.uchicago.edu | NHS England                                                                                                                   | www.nhs.uk/england/           |
|                                             |                                          |                                                                        |                                     | NHS Scotland                                                                                                                  | www.show.scot.nhs<br>.uk      |
|                                             |                                          |                                                                        |                                     | NHS Wales: Health<br>of Wales<br>Information<br>Service                                                                       | www.wales.nhs.uk              |

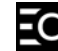

| Canada |                                | United States |     | United Kingdom                                      |                                          |
|--------|--------------------------------|---------------|-----|-----------------------------------------------------|------------------------------------------|
| Site   | Uniform resource locator (URL) | Site          | URL | Site                                                | URL                                      |
|        |                                |               |     | Online Directory of UK Expert Witnesses             | www.expertsearch.co.uk                   |
|        |                                |               |     | Oxford Radcliffe Hospitals NHS Trust                | www.oxfordradcliffe.nhs.uk               |
|        |                                |               |     | Postgraduate Medical & Dental Education in Wales    | www.cardiff.ac.uk/pgmde/sections/dental/ |
|        |                                |               |     | Royal College of Physicians of Edinburgh            | www.rcpe.ac.uk                           |
|        |                                |               |     | The Scottish Government                             | www.scotland.gov.uk                      |
|        |                                |               |     | St George's University of London                    | www.sgul.ac.uk                           |
|        |                                |               |     | Student BMJ                                         | www.studentbmj.com                       |
|        |                                |               |     | University College London                           | www.ucl.ac.uk                            |
|        |                                |               |     | University College London Institute of Child Health | www.ich.ucl.ac.uk                        |
|        |                                |               |     | University of Dundee                                | www.dundee.ac.uk                         |
|        |                                |               |     | University of Essex                                 | www.essex.ac.uk                          |
|        |                                |               |     | The UK's Faculty of Public Health                   | www.fph.org.uk                           |
|        |                                |               |     | University of Leicester                             | www.le.ac.uk                             |
|        |                                |               |     | The University of Warwick                           | www2.warwick.ac.uk                       |
